# Supplementary material for: ZmCOP1 Regulates Maize Mesocotyl Length and Plant Height through the Phytohormone Pathways
Source: MDPI journal article supplement (doi:10.3390/life13071522), 2023-07-07
Supplement: s1 [file s1]

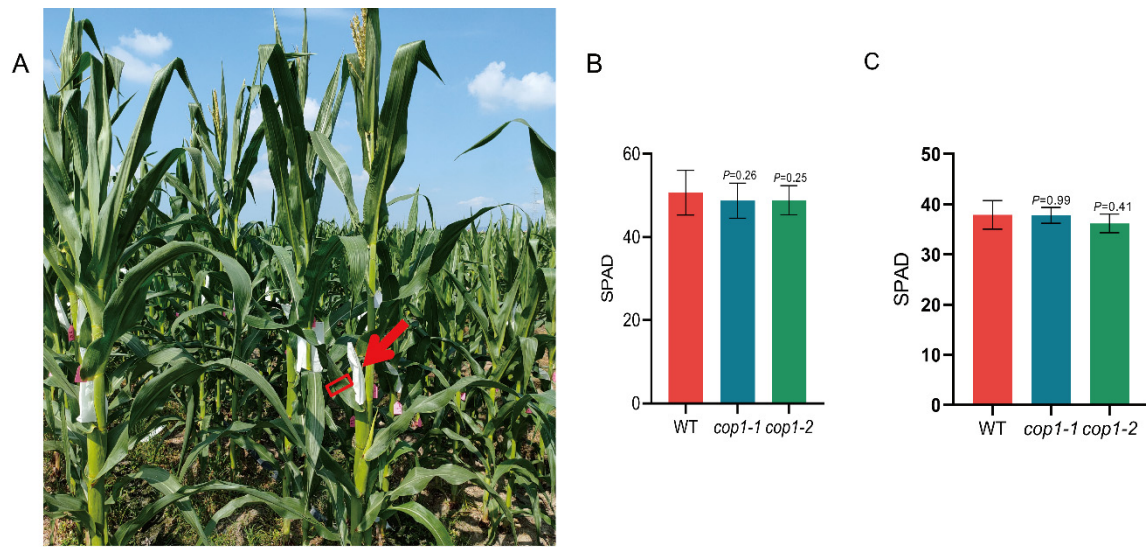

**Fig. S2.** Measurement of relative content of chlorophyll.

(A) The leaf site of relative content of chlorophyll. (B) SPAD of the ear leaves. (C) SPAD of the first leaves. Data are mean  $\pm$  SD of at least 20 plants.

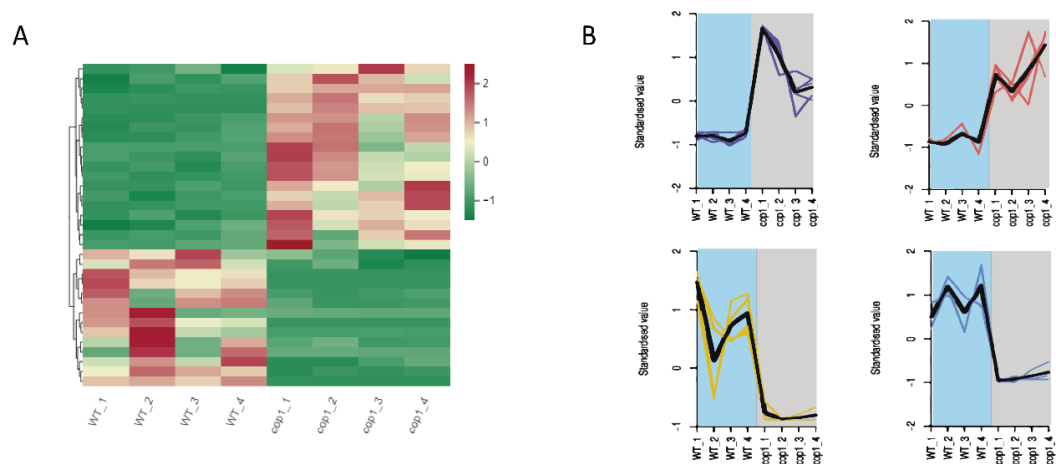

**Fig. S3.** RNA-seq results showed that *zmcop1* mutation led to changes in the expression of some genes.

(A) Differential gene clustering heat map. Abscissa denotes sample name and hierarchical clustering result, ordinate indicates differential gene and hierarchical clustering result. Red indicates high expression and green indicates low expression. (B) Kmeans cluster diagram. The Abscissa represents the sample, and the ordinate represents the standardized expression.
