# Supplementary material for: ZmCOP1 Regulates Maize Mesocotyl Length and Plant Height through the Phytohormone Pathways
Source: Life (Basel). 2023 Jul 7;13(7):1522. doi: 10.3390/life13071522 (PMC10381158; doi:10.3390/life13071522)
Supplement: Supplementary file 1 [file life-13-01522-s001.zip › Supplementary+Table+S1.xlsx]

## Sheet: Supplementary Table1
Table S1 The primers used in this experiment
Purpose	Gene ID	Name	Sequence (5'-3')
QRT photoresponse related genes		ZmCHS-F	CGTGAACCGCCTGATGATGTA
		ZmCHS-R	TTGTTCTCCGCCAGGTCCTT
		ZmNIA2-F	ACTACCACTACCGGGACAACC
		ZmNIA2-R	CCGAGTTGATGTTGAGCTCGT
		ZmPHYA-F	ACAGGGCCATCATTCACAACC
		ZmPHYA-R	AGGAGCATCCTGTCGATCACC
QRT BR related genes	Zm00008a013974	ZmBRI1-F	GCCTCCTGAAGCCATAGACCT
	Zm00008a013974	ZmBRI1-R	TAGGCGTGCATTCGGTGTCC
	Zm00008a010760	ZmBIN2-F	GCCTCCTGAAGCCATAGACCT
	Zm00008a010760	ZmBIN2-R	TAGGCGTGCATTCGGTGTCC
	Zm00008a000299	ZmBZR1-F	CACTGCGACAACAACGACGTG
	Zm00008a000299	ZmBZR1-R	GCCGTATATGGATCTCTGCTGC
qRT Control gene		ZmUBQ-F	CTGGTGCCCTCTCCATATGG
		ZmUBQ-R	CAACACTGACACGACTCATGACA
		ZmActin1-F	GAGCGGGAGATTGTCAGGG
		ZmActin1-R	AAGGGATGGTTGGAACAGCA
qRT	GRMZM2G137046	ZmHY5-F	CCGACAGATACTGAAGAACA
	GRMZM2G137046	ZmHY5-R	GCTGTCTGACCCCAGTTTTTG
	GRMZM2G039828	ZmHY5L-F	AGCGGAAGAAGGCGTACCTGA
	GRMZM2G039828	ZmHY5L-R	CGTGTTGTTCTCGTTCTGGAGC
	GRMZM2G126795	ZmCOP1L-F	CTGCTGCGGGCACTACCTTA
	GRMZM2G126795	ZmCOP1L-R	CCCATTTCATTTCCCTGTTG
	GRMZM2G104920	ZmCOP1-F	TGGGATGTCAAGGATAACTGCC
	GRMZM2G104920	ZmCOP1-R	TGTTCACAGACAAGCCAACAAA
EMS mutant confirmation	GRMZM2G104920	ZmCOP1-1-F	TGCTGGGCTGCCATATACAA
	GRMZM2G104920	ZmCOP1-1-R	CATTGGGCTCGTCGATTCTC
	GRMZM2G104920	ZmCOP1-2-F	TGGGTGTAATGTGGGAGGAA
	GRMZM2G104920	ZmCOP1-2-R	TGCTAGTCTTCTTACACTGCCT
Verification of differentially expressed genes by QRT in RNA-seq	Zm00001eb309760-F		AACCATGTTCCTGGGCAGAGT
	Zm00001eb309760-R		GCAGTGATGCATTAATCCCAAGC
	Zm00001eb286470-F		CAGCACTGATGCAAAGTCCATAG
	Zm00001eb286470-R		AGAATTGTGGCAGGCAAAGACAC
	Zm00001eb048840-F		CGTATTGGTCTGTTGGCTCTGC
	Zm00001eb048840-R		CTTTCGCGACAATGTCCTCAGC
	Zm00001eb339770-F		TTCCAAGATTGCCCAGAACAGT
	Zm00001eb339770-R		GGTCAAGTCTTGCAATGAGCA
	Zm00001eb034320-F		GAACCGGCAGAACGAGGACTAC
	Zm00001eb034320-R		CGTCGTCGGGATCATGAAGG
